# Supplementary material for: Intrauterine Exposure to Maternal Diabetes Is Associated With Higher Adiposity and Insulin Resistance and Clustering of Cardiovascular Risk Markers in Indian Children
Source: PubMed Central journal article supplement — Diabetes Care. 2009 Nov 16;33(2):402–4. doi: 10.2337/dc09-1393 (PMC2809291; doi:10.2337/dc09-1393), 2009-11-16
Supplement: supp_dc09-1393v09_DC09-1393_online_appendix.pdf [file supp_dc09-1393v09_DC09-1393_online_appendix.pdf]

**Figure A1. Median subscapular skinfold thickness (mm) for offspring of diabetic mothers (ODM), offspring of diabetic fathers (ODF) and controls 0-9.5 years**

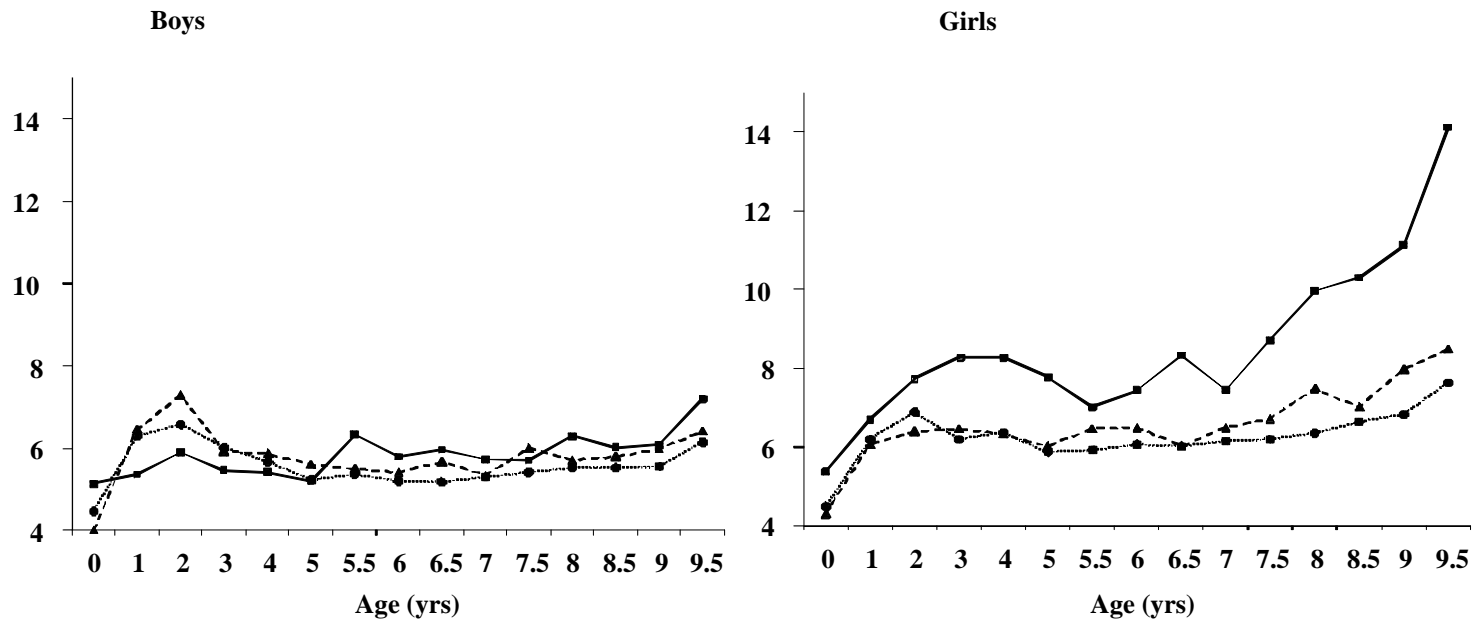

Continuous lines with black squares: ODM; long-dashed lines with black triangles: ODF; short-dashed lines with black circles: Control offspring. P for difference between ODM and controls was significant (<0.05) at birth for boys, and all time points, except 1-year for girls.
